# Supplementary material for: Biosensors Based on Ion-Sensitive Field-Effect Transistors for HLA and MICA Antibody Detection in Kidney Transplantation
Source: MDPI journal article supplement (doi:10.3390/molecules27196697), 2022-10-08
Supplement: s1 [file s1]

# Supplementary materials for the manuscript

ID: molecules-1375863

Title: Fabrication of Ion Sensitive Field Effect Transistor-based Biosensors for HLA and MICA Antibodies Detection in Kidney Transplantation

## 1. Limit of detection (LoD) and limit of quantitation

Table S1 The gate potential changes of the blank solution obtained from 10 individual ISFETs for each antibody

| No.         | Anti-HLA (0 µg/mL) |                               | Anti-MICA (0 µg/mL) |                               |
|-------------|--------------------|-------------------------------|---------------------|-------------------------------|
|             | ISFET ID           | $\Delta V_{gs}$ of blank (mV) | ISFET ID            | $\Delta V_{gs}$ of blank (mV) |
| 1           | D03_296            | 2.50                          | D03_462             | 5.10                          |
| 2           | D03_339            | 2.90                          | D03_465             | 4.40                          |
| 3           | D03_350            | 1.90                          | D03_484             | 7.06                          |
| 4           | D03_1567           | 1.80                          | D03_1490            | 4.32                          |
| 5           | D03_1568           | 3.50                          | D03_1258            | 6.01                          |
| 6           | D03_1478           | 2.60                          | D03_1259            | 3.00                          |
| 7           | D03_1479           | 1.40                          | D03_745             | 2.80                          |
| 8           | D03_1481           | 1.60                          | D03_746             | 5.04                          |
| 9           | D03_1483           | 2.10                          | D03_782             | 3.48                          |
| 10          | D03_1484           | 2.70                          | D03_808             | 1.10                          |
| <b>Mean</b> |                    | <b>2.30</b>                   | <b>Mean</b>         | <b>4.23</b>                   |
| <b>SD</b>   |                    | <b>0.65</b>                   | <b>SD</b>           | <b>1.72</b>                   |

### 1.1 Calculation of LoD

The LoD was calculated using the formula (1),  $LoD = 3\sigma/S$ ;

$$\begin{aligned} LoD_{(Anti-HLA)} &= 3(0.65)/0.9862 \\ &= 1.98 \mu\text{g/mL} \end{aligned}$$

$$\begin{aligned} LoD_{(Anti-MICA)} &= 3(1.78)/0.9986 \\ &= 5.17 \mu\text{g/mL} \end{aligned}$$

### 1.2 Calculation of LoQ

The LoD was calculated using the formula (2),  $LoD = 10\sigma/S$ ;

$$\begin{aligned} LoQ_{(Anti-HLA)} &= 10(0.65)/0.9862 \\ &= 6.59 \mu\text{g/mL} \end{aligned}$$

$$\begin{aligned} LoQ_{(Anti-MICA)} &= 10(1.78)/0.9986 \\ &= 17.22 \mu\text{g/mL} \end{aligned}$$

## 2. Cut-off determination

**Table S2** The gate potential changes of the isotype antibody (negative control) obtained from seven different concentrations of antibodies.

| Isotype of anti-HLA                    |                                                      | Isotype of anti-MICA                   |                                                      |
|----------------------------------------|------------------------------------------------------|----------------------------------------|------------------------------------------------------|
| Antibody Conc.<br>( $\mu\text{g/mL}$ ) | $\Delta V_{\text{gs}}$ (antibody) of<br>Isotype (mV) | Antibody Conc.<br>( $\mu\text{g/mL}$ ) | $\Delta V_{\text{gs}}$ (antibody) of<br>Isotype (mV) |
| 0                                      | 2.43                                                 | 0                                      | 5.52                                                 |
| 5                                      | 2.63                                                 | 5                                      | 5.43                                                 |
| 10                                     | 2.70                                                 | 10                                     | 6.33                                                 |
| 20                                     | 3.33                                                 | 20                                     | 6.65                                                 |
| 40                                     | 3.49                                                 | 40                                     | 7.19                                                 |
| 80                                     | 3.40                                                 | 80                                     | 7.47                                                 |
| 160                                    | 3.93                                                 | 160                                    | 7.43                                                 |
| Mean                                   | 3.13                                                 | Mean                                   | 6.57                                                 |
| SD                                     | 0.55                                                 | SD                                     | 0.85                                                 |
| Cut-off                                | 4.78                                                 | Cut-off                                | 9.12                                                 |

Calculation of cut-off value

The cut-off value was calculated using the formula (3),  $\text{Cut-off} = \alpha \cdot \bar{X} + f \cdot \text{SD}$ ;

$$\begin{aligned}\text{Cut-off}_{(\text{Anti-HLA})} &= (1 \times 3.13) + (3 \times 0.55) \\ &= 4.78 \text{ mV}\end{aligned}$$

$$\begin{aligned}\text{Cut-off}_{(\text{Anti-MICA})} &= (1 \times 6.57) + (3 \times 0.85) \\ &= 9.12 \text{ mV}\end{aligned}$$

## 3. Analytical precision

**Table S3** The reproducibility of the ISFET-based immunosensor for anti-HLA and anti-MICA detection.

| No. | anti-HLA (20 $\mu\text{g/mL}$ ) |                                   |                                                                        | anti-MICA (20 $\mu\text{g/mL}$ ) |                                   |                                                                        |
|-----|---------------------------------|-----------------------------------|------------------------------------------------------------------------|----------------------------------|-----------------------------------|------------------------------------------------------------------------|
|     | ISFET ID                        | $\Delta V_{\text{gs}}$ (antibody) | Antibody concentration<br>from the inter-assay<br>( $\mu\text{g/mL}$ ) | ISFET ID                         | $\Delta V_{\text{gs}}$ (antibody) | Antibody concentration<br>from the inter-assay<br>( $\mu\text{g/mL}$ ) |
| 1   | D03_479                         | 9.50                              | 19.30                                                                  | D03_1406                         | 10.10                             | 19.28                                                                  |
| 2   | D03_480                         | 10.60                             | 22.76                                                                  | D03_1420                         | 10.08                             | 19.20                                                                  |
| 3   | D03_502                         | 10.80                             | 23.39                                                                  | D03_1558                         | 9.90                              | 18.41                                                                  |
| 4   | D03_503                         | 11.12                             | 24.40                                                                  | D03_1060                         | 10.30                             | 20.16                                                                  |
| 5   | D03_504                         | 10.20                             | 21.50                                                                  | D03_1061                         | 10.50                             | 21.03                                                                  |
| 6   | D03_1211                        | 10.50                             | 22.45                                                                  | D03_1062                         | 10.20                             | 19.72                                                                  |
| 7   | D03_1219                        | 9.90                              | 20.56                                                                  | D03_1575                         | 9.60                              | 17.10                                                                  |
| 8   | D03_1231                        | 8.70                              | 16.78                                                                  | D03_1576                         | 10.53                             | 21.16                                                                  |
| 9   | D03_1233                        | 9.30                              | 18.67                                                                  | D03_1582                         | 10.90                             | 22.77                                                                  |
| 10  | D03_1234                        | 9.70                              | 19.93                                                                  | D03_1584                         | 11.01                             | 23.25                                                                  |
|     | Mean                            | 10.03                             | 20.97                                                                  | Mean                             | 10.31                             | 20.21                                                                  |
|     | SD                              | 0.71                              | 2.24                                                                   | SD                               | 0.41                              | 1.80                                                                   |
|     | %CV                             | 7.09                              | 10.69                                                                  | %CV                              | 4.00                              | 8.92                                                                   |

#### 4. Sensitivity and specificity in the experimental setting

**Table S4** The sensitivity and specificity in the experimental setting for anti-HLA

| Anti-HLA |          |                                       | Isotype control    |          |                                       |
|----------|----------|---------------------------------------|--------------------|----------|---------------------------------------|
| No.      | ISFET ID | $\Delta V_{gs}$ after Ab binding (mV) | No.                | ISFET ID | $\Delta V_{gs}$ after Ab binding (mV) |
| 1        | D03_343  | 13                                    | 1                  | D03_550  | 3.2                                   |
| 2        | D03_351  | 8                                     | 2                  | D03_553  | 2.6                                   |
| 3        | D03_1614 | 8.5                                   | 3                  | D03_546  | 2.9                                   |
| 4        | D03_244  | 2.9                                   | 4                  | D03_127  | 1.7                                   |
| 5        | D03_248  | 3.8                                   | 5                  | D03_245  | 8.2                                   |
| 6        | D03_258  | 4.4                                   | 6                  | D03_249  | 7.3                                   |
| 7        | D03_139  | 10.41                                 | 7                  | D03_255  | 6.2                                   |
| 8        | D03_147  | 9.81                                  | 8                  | D03_481  | 2                                     |
| 9        | D03_117  | 1.2                                   | 9                  | D03_482  | 2                                     |
| 10       | D03_477  | 8.92                                  | 10                 | D03_520  | 1.3                                   |
| 11       | D03_479  | 9.5                                   | 11                 | D03_523  | 4.2                                   |
| 12       | D03_480  | 10.6                                  | 12                 | D03_530  | 4.4                                   |
| 13       | D03_502  | 10.8                                  | 13                 | D03_531  | 3.1                                   |
| 14       | D03_503  | 11.12                                 | 14                 | D03_532  | 2.5                                   |
| 15       | D03_504  | 10.2                                  | 15                 | D03_535  | 2.8                                   |
| 16       | D03_1211 | 10.5                                  | 16                 | D03_584  | 2.7                                   |
| 17       | D03_1219 | 9.9                                   | 17                 | D03_550  | 2.5                                   |
| 18       | D03_1231 | 8.7                                   | 18                 | D03_1239 | 3.6                                   |
| 19       | D03_1233 | 9.3                                   | 19                 | D03_1307 | 2.7                                   |
| 20       | D03_1234 | 9.7                                   | 20                 | D03_1440 | 3.5                                   |
|          |          |                                       | 21                 | D03_1441 | 3.4                                   |
|          |          |                                       | 22                 | D03_1439 | 3.1                                   |
|          |          |                                       | <b>Sensitivity</b> |          | 80.00%                                |
|          |          |                                       | <b>Specificity</b> |          | 86.36%                                |

The cut-off value used to distinguish between positive and negative is 4.78 mV.

Immobilized-protein concentration is 10  $\mu\text{g/mL}$ .

The concentration of anti-HLA and isotype antibody control used in the experiment is 20  $\mu\text{g/mL}$ .

The gray label showed the  $\Delta V_{gs}(\text{Antibody})$  that were less than or equal to the cut-off value (false negative).

The blue label showed the  $\Delta V_{gs}(\text{Antibody})$  that were greater than the cut-off value (false positive).

**Table S5** The sensitivity and specificity in the experimental setting for anti-MICA

| Anti-MICA |          |                                       | Isotype control |          |                                       |
|-----------|----------|---------------------------------------|-----------------|----------|---------------------------------------|
| No.       | ISFET ID | $\Delta V_{gs}$ after Ab binding (mV) | No.             | ISFET ID | $\Delta V_{gs}$ after Ab binding (mV) |
| 1         | D03_1582 | 12.9                                  | 1               | D03_914  | 8.26                                  |
| 2         | D03_1584 | 11.2                                  | 2               | D03_915  | 10.55                                 |
| 3         | D03_804  | 9.5                                   | 3               | D03_916  | 5.61                                  |
| 4         | D03_837  | 12.3                                  | 4               | D03_944  | 4.9                                   |
| 5         | D03_876  | 11.4                                  | 5               | D03_952  | 7.84                                  |
| 6         | D03_893  | 12.5                                  | 6               | D03_958  | 5.89                                  |
| 7         | D03_901  | 15.32                                 | 7               | D03_960  | 5.12                                  |
| 8         | D03_905  | 11.6                                  | 8               | D03_838  | 5.24                                  |
| 9         | D03_910  | 18.5                                  | 9               | D03_841  | 7.27                                  |
| 10        | D03_744  | 12                                    | 10              | D03_843  | 6.67                                  |
| 11        | D03_747  | 11.1                                  | 11              | D03_845  | 5.19                                  |
| 12        | D03_765  | 13.46                                 | 12              | D03_882  | 6.54                                  |
| 13        | D03_782  | 9.11                                  | 13              | D03_884  | 3.22                                  |
| 14        | D03_794  | 12.47                                 | 14              | D03_930  | 11.23                                 |
| 15        | D03_801  | 10.55                                 | 15              | D03_860  | 5.7                                   |
| 16        | D03_828  | 11.96                                 | 16              | D03_874  | 7.1                                   |
| 17        | D03_807  | 11.3                                  | 17              | D03_878  | 4.9                                   |
| 18        | D03_808  | 13.81                                 | 18              | D03_885  | 5.5                                   |
| 19        | D03_815  | 6.6                                   | 19              | D03_886  | 5.9                                   |
| 20        | D03_816  | 11.2                                  | 20              | D03_890  | 9.9                                   |
| 21        | D03_829  | 10.2                                  | 21              | D03_900  | 8.1                                   |
| 22        | D03_832  | 11.4                                  | 22              | D03_846  | 2.2                                   |
| 23        | D03_839  | 13.1                                  | 23              | D03_848  | 5.5                                   |
| 24        | D03_849  | 12.6                                  | 24              | D03_868  | 5.3                                   |
| 25        | D03_746  | 11.8                                  | 25              | D03_875  | 7.7                                   |
| 26        | D03_755  | 8.5                                   | 26              | D03_877  | 3.6                                   |
| 27        | D03_769  | 13.8                                  | 27              | D03_895  | 8.2                                   |
| 28        | D03_820  | 7.1                                   |                 |          |                                       |
| 29        | D03_826  | 12.2                                  |                 |          |                                       |
| 30        | D03_834  | 12.4                                  |                 |          |                                       |
|           |          |                                       | Sensitivity     |          | 86.67%                                |
|           |          |                                       | Specificity     |          | 88.89%                                |

The cut-off value used to distinguish between positive and negative is 9.12 mV.

Immobilized-protein concentration is 50  $\mu\text{g/mL}$ .

The concentration of anti-HLA and isotype antibody control used in the experiment is 20  $\mu\text{g/mL}$ .

The gray label showed the  $\Delta V_{gs}(\text{Antibody})$  that were less than or equal to the cut-off value (false negative).

The blue label showed the  $\Delta V_{gs}(\text{Antibody})$  that were greater than the cut-off value (false positive).
